# Supplementary material for: Goethite nanoparticle aggregation: effects of buffers, metal ions, and 4-chloronitrobenzene reduction
Source: Royal Society of Chemistry journal article supplement (doi:10.1039/c3en00063j), 2014-01-01
Supplement: c3en00063j1.pdf [file c3en00063j1.pdf]

**Supplementary Information for**  
**Goethite Nanoparticle Aggregation: Effects of Buffers, Metal Ions,**  
**and 4-Chloronitrobenzene Reduction**

*Environmental Science: Nano*

Amanda M. Stemig,<sup>a</sup> Tram Anh Do,<sup>a</sup> Virany M. Yuwono,<sup>a</sup> William A. Arnold,<sup>b</sup> and R. Lee Penn<sup>a</sup>

<sup>a</sup> *Department of Chemistry, 207 Pleasant St SE, Minneapolis, MN, 55455, USA. Fax: 01 612-626-7541;*

*Tel: 01 612-624-6000; E-mail: rleepenn@umn.edu*

<sup>b</sup> *Department of Civil Engineering, 500 Pillsbury Dr SE, Minneapolis, MN, 55455, USA. Fax: 01 612-*

*626-7750; Tel: 01 612-625-8582; E-mail: arnol032@umn.edu*

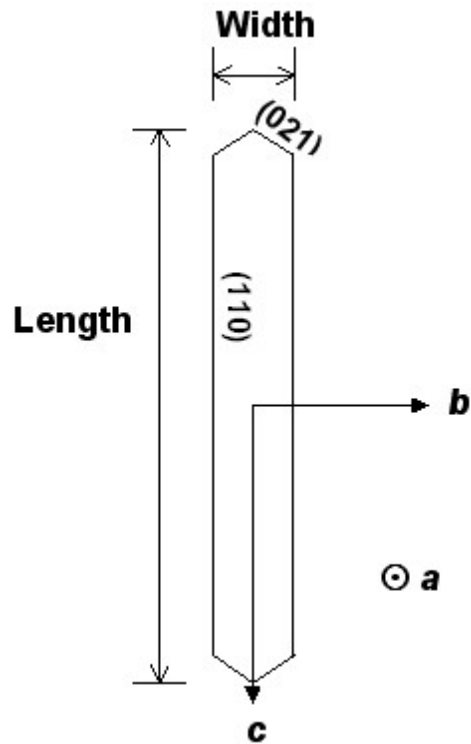

**Figure S1.** Schematic diagram of goethite nanoparticle

**Table S1.** Properties of goethite particles

| $SA_{BET}^1$<br>( $m^2/g$ ) | $SA_{TEM}^2$<br>( $m^2/g$ ) | Width <sup>3</sup><br>(nm) | Length <sup>3</sup><br>(nm) |
|-----------------------------|-----------------------------|----------------------------|-----------------------------|
| $136.8 \pm 0.5$             | $218.6 \pm 86.4$            | $8.9 \pm 3.9$              | $63.7 \pm 22.9$             |

<sup>1</sup>Surface area measure via nitrogen gas absorption/desorption (BET measurement).

<sup>2</sup>Surface area calculated from TEM measurements.

<sup>3</sup>Width and length are defined in Figure S1.

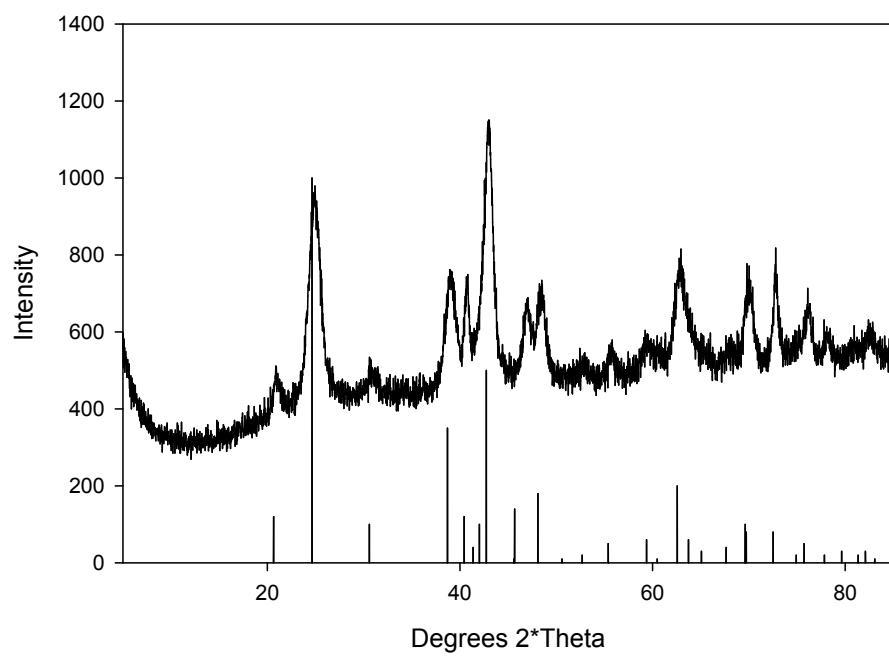

**Figure S2.** Experimental XRD pattern of goethite nanoparticles with goethite PDF.

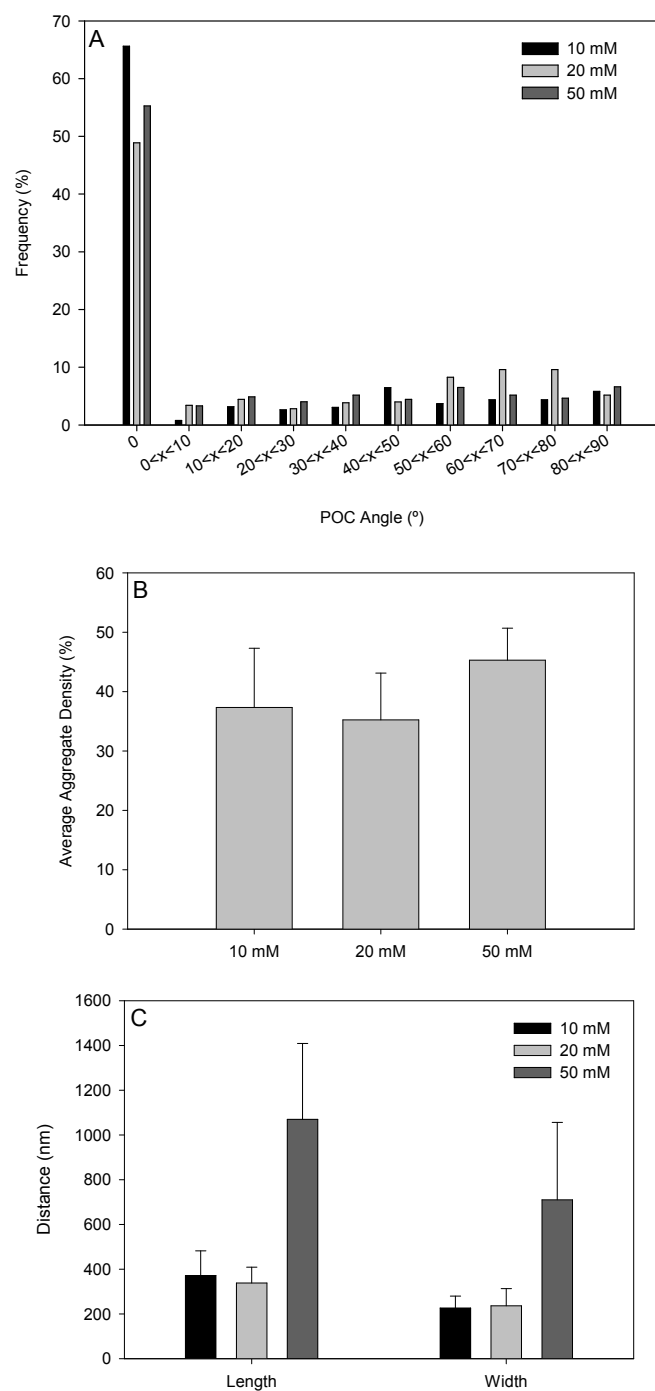

**Figure S3.** TEM image analysis of goethite nanoparticles suspended in 10, 20, and 50 mM MOPS buffer. Frequency of angles between nanoparticle contacts (A), average aggregate

density (B), and average aggregate length and width (C) were measured for 6 images per concentration.

**Table S2.** pH of reactors at various MOPS concentration at preparation, after equilibration with the goethite and Fe(II), and after reaction with 4-CINB

| MOPS Concentration (mM) | pH after preparation | pH after equilibration | pH after 2 hours reaction with 4-CINB |
|-------------------------|----------------------|------------------------|---------------------------------------|
| 5                       | 6.84                 | 6.52                   | 6.39                                  |
| 10                      | 6.83                 | 6.73                   | 6.64                                  |
| 20                      | 6.80                 | 6.73                   | 6.69                                  |
| 30                      | 6.79                 | 6.75                   | 6.74                                  |
| 40                      | 6.83                 | 6.77                   | 6.76                                  |
| 50                      | 6.85                 | 6.81                   | 6.79                                  |

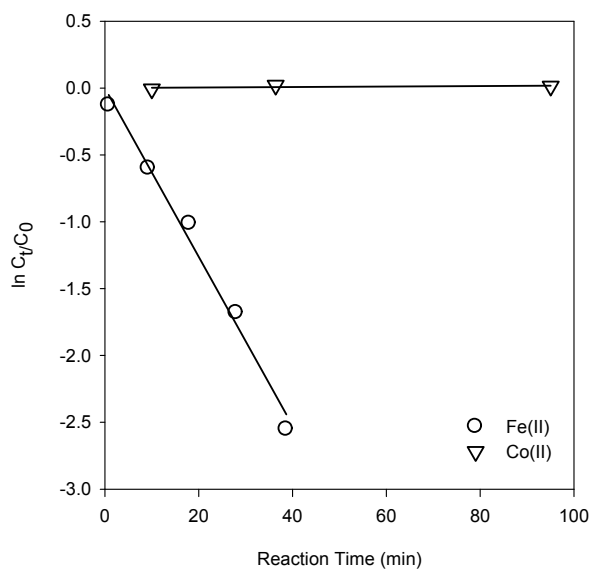

**Figure S4:** Degradation kinetics of methanolic 4-CINB in the presence of 20 mM MOPS, 1 mM M(II), and 0.325 g/L goethite nanoparticles.

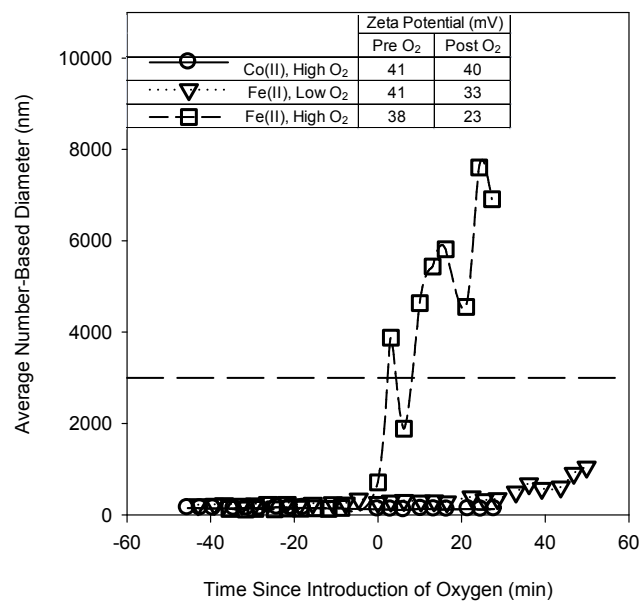

**Figure S5:** Goethite aggregation kinetics and surface charge measurements before and after the addition of different levels of oxygen. The dashed line at 3000 nm represents the upper quantitative detection limit of the instrumentation.
